# Supplementary material for: Assessing the Comprehensive Training Needs of Informal Caregivers of Cancer Patients: A Qualitative Study
Source: MDPI journal article supplement (doi:10.3390/curroncol30040291), 2023-03-29
Supplement: s1 [file s1]

## Supplementary File S1. Draft Caregiver Curriculum Outline

**Figure S1.** Managing the medical aspects of illness.

| How to Manage...                                                                                                                                                                                                                                                                                                                                                                                                                                                                                                                                                                                                                                                                                                                                                                                                                                                                                                                   | How to Maintain a Healthy Lifestyle                                                                                                                                                                                                                              | How to Perform Clinical Tasks                                                                                                                                                                                                                                                                                                                                                                                                                                                                                                                                                                                                                              |
|------------------------------------------------------------------------------------------------------------------------------------------------------------------------------------------------------------------------------------------------------------------------------------------------------------------------------------------------------------------------------------------------------------------------------------------------------------------------------------------------------------------------------------------------------------------------------------------------------------------------------------------------------------------------------------------------------------------------------------------------------------------------------------------------------------------------------------------------------------------------------------------------------------------------------------|------------------------------------------------------------------------------------------------------------------------------------------------------------------------------------------------------------------------------------------------------------------|------------------------------------------------------------------------------------------------------------------------------------------------------------------------------------------------------------------------------------------------------------------------------------------------------------------------------------------------------------------------------------------------------------------------------------------------------------------------------------------------------------------------------------------------------------------------------------------------------------------------------------------------------------|
| <ul style="list-style-type: none"> <li>• Pain<sup>[SEP]</sup></li> <li>• Fatigue<sup>[SEP]</sup></li> <li>• Weakness<sup>[SEP]</sup></li> <li>• Hair loss<sup>[SEP]</sup></li> <li>• Nausea and vomiting<sup>[SEP]</sup></li> <li>• Changes in appetite and nutrition requirements<sup>[SEP]</sup></li> <li>• Maintaining a normal calorie intake</li> <li>• Managing anorexia/weight-changes</li> <li>• Changes in bowel habits</li> <li>• Diarrhea</li> <li>• Constipation</li> <li>• Incontinence/frequent urination</li> <li>• Changes in behaviour, character, or cognition<sup>[SEP]</sup></li> <li>• Changes in sleep quality and quantity<sup>[SEP]</sup></li> <li>• The side effects of medication<sup>[SEP]</sup></li> <li>• The long-term consequences of treatment</li> <li>• The impact of cancer on fertility</li> <li>• How to manage changes in sexual intimacy</li> <li>• How to engage in safe sexual</li> </ul> | <ul style="list-style-type: none"> <li>• How to exercise and engage in physical activity during treatment</li> <li>• Managing the risk of falling</li> <li>• Maintaining optimal mobility<sup>[SEP]</sup></li> <li>• The benefits of quitting smoking</li> </ul> | <ul style="list-style-type: none"> <li>• Post-surgery care<sup>[SEP]</sup></li> <li>• Infection prevention and control</li> <li>• Hand hygiene</li> <li>• How to lower your risk of infection</li> <li>• Wound care</li> <li>• Lacerations &amp; abrasions<sup>[SEP]</sup></li> <li>• Cleaning your wound<sup>[SEP]</sup></li> <li>• Packing your wound<sup>[SEP]</sup></li> <li>• Dressing and bandaging<sup>[SEP]</sup></li> <li>• Caring for your surgical drain</li> <li>• Caring for a central line<sup>[SEP]</sup></li> <li>• Caring for a feeding tubes</li> <li>• Care for an ostomy<sup>[SEP]</sup></li> <li>• Care for a tracheostomy</li> </ul> |

---

practices (e.g. when to use condoms,  
can you get partner sick)

- Exploring alternative fertilization options (e.g. freezing your eggs)
- Coping with impotence • Cancer and menopause

**Figure S2.** Managing changes in roles and relationships to accommodate illness.

| How to Manage Changes in your Relationship with...                                                                                                                                                                                                                                                     | Developing Adaptive Communication Strategies                                                                                                                                                                                                                                                                                                                                                                                                                               | Obtaining Psychosocial Support                                                                                                                                                                                                                                                                                                                                                                                                                                                     |
|--------------------------------------------------------------------------------------------------------------------------------------------------------------------------------------------------------------------------------------------------------------------------------------------------------|----------------------------------------------------------------------------------------------------------------------------------------------------------------------------------------------------------------------------------------------------------------------------------------------------------------------------------------------------------------------------------------------------------------------------------------------------------------------------|------------------------------------------------------------------------------------------------------------------------------------------------------------------------------------------------------------------------------------------------------------------------------------------------------------------------------------------------------------------------------------------------------------------------------------------------------------------------------------|
| <ul style="list-style-type: none"> <li>• Your spouse/significant other<sup>[1][2]</sup></li> <li>• Individuals in the workplace<sup>[1][2]</sup></li> <li>• Your friends and family (e.g. children)</li> <li>• Yourself (e.g. how to define your identity in the face of a role transition)</li> </ul> | <ul style="list-style-type: none"> <li>• How to make decisions as a team/patient caregiver pair</li> <li>• How to share your thoughts and feelings</li> <li>• How to demonstrate active listening (e.g. validating feelings, demonstrating understanding)</li> <li>• How to minimize un-adaptive coping (e.g. nagging, criticizing)<sup>[1][2]</sup></li> <li>• How to communicate with medical staff</li> <li>• How to talk to your children about your cancer</li> </ul> | <ul style="list-style-type: none"> <li>• How to find and ask for help from others<sup>[1][2]</sup></li> <li>• How to access counselling services at PMCC</li> <li>• How to connect with others who share a similar experience with others (e.g. support group services at PMCC)<sup>[1][2]</sup></li> <li>• How to connect with the patient beyond providing care (e.g. activities offered at PMCC, like art and exercise classes, that family members can do together)</li> </ul> |

- 
- How to talk to your children about death and dying

**Figure S3.** Managing the psychological consequences of illness through use of problem-solving coping strategies.

| How to Cope with...                                                                                                                                                                                                                                                                                                                                                                                                                                                                                                                                                                                                                                                                                                                                         | Mood and Affect Management Techniques                                                                                                                                                                    | Developing Positive Self-Schema                                                                                                                                                                |
|-------------------------------------------------------------------------------------------------------------------------------------------------------------------------------------------------------------------------------------------------------------------------------------------------------------------------------------------------------------------------------------------------------------------------------------------------------------------------------------------------------------------------------------------------------------------------------------------------------------------------------------------------------------------------------------------------------------------------------------------------------------|----------------------------------------------------------------------------------------------------------------------------------------------------------------------------------------------------------|------------------------------------------------------------------------------------------------------------------------------------------------------------------------------------------------|
| <ul style="list-style-type: none"> <li>• Stress<sup>[1][SEP]</sup></li> <li>• Anxiety<sup>[1][SEP]</sup></li> <li>• Depression<sup>[1][SEP]</sup></li> <li>• Grief/loss<sup>[1][SEP]</sup></li> <li>• Hopelessness<sup>[1][SEP]</sup></li> <li>• Worry/fear (e.g. of cancer re-occurrence, of treatment failure)<sup>[1][SEP]</sup></li> <li>• Anger/guilt<sup>[1][SEP]</sup></li> <li>• Changes in the patient's body image</li> <li>• Changes in the patient's self image<sup>[1][SEP]</sup></li> <li>• Changes in the patient's thinking and cognition (e.g. delirium)<sup>[1][SEP]</sup></li> <li>• Unpleasant emotions you have due to the patient's cancer diagnosis<sup>[1][SEP]</sup></li> <li>• The emotional reactions of others (e.g.</li> </ul> | <ul style="list-style-type: none"> <li>• Maintaining optimism<sup>[1][SEP]</sup></li> <li>• Mindfulness and relaxation<sup>[1][SEP]</sup></li> <li>• Addressing negative beliefs about cancer</li> </ul> | <ul style="list-style-type: none"> <li>• Strategies to improve self-esteem and self- efficacy</li> <li>• Coping with loss of personal control</li> <li>• Developing self-compassion</li> </ul> |

---

---

friends/family) to the patient's cancer

diagnosis<sup>[11]</sup><sub>SEP</sub>

- Uncertainty about the future
-
